# Supplementary material for: Application of pea-like yolk–shell structured Fe3O4@TiO2 nanosheets for photocatalytic and photo-Fenton oxidation of bisphenol-A
Source: Royal Society of Chemistry journal article supplement (doi:10.1039/c9ra04084f), 2019-01-01
Supplement: c9ra04084f1.pdf [file c9ra04084f1.pdf]

# **Application of pea-like yolk-shell structured $\text{Fe}_3\text{O}_4@\text{TiO}_2$ nanosheets for photocatalytic and photo-Fenton oxidation of bisphenol-A**

Xingxing Li, Mingcan Cui, Yonghyeon Lee, Jongbok Choi, Jeehyeong Khim\*

*School of Civil, Environmental, and Architectural Engineering, Korea University, 145 Anam-ro, Seongbuk-gu, Seoul 02841, Republic of Korea*

*E-mail: hyeong@korea.ac.kr*

## **List of supporting information**

- 1. Schematic diagram of experimental set up**
- 2. Wave length of the UV lamp**
- 3. TEM images of  $\text{Fe}_3\text{O}_4@\text{SiO}_2@\text{TiO}_2$  with different ammonia content**
- 4. TEM images of pea-like  $\text{Fe}_3\text{O}_4@\text{SiO}_2@\text{TiO}_2$  with different diameter of mixing paddle**
- 5. Schematic diagram of formation mechanism of pea-like  $\text{Fe}_3\text{O}_4@\text{SiO}_2@\text{TiO}_2$**
- 6. TEM images of PLYS- $\text{Fe}_3\text{O}_4@\text{TiO}_2$  spheres with different concentration of NaOH**
- 7. TEM and SEM images of PLYS- $\text{Fe}_3\text{O}_4@\text{TiO}_2$**
- 8. EDS of PLYS- $\text{Fe}_3\text{O}_4@\text{TiO}_2$**
- 9. Iron leaching test**
- 10. TOC removal efficiency calculation**
- 11. Comparing reaction rate constants in different systems and conditions**

## **1. Schematic diagram of experimental set**

**Fig. S1**

## **2. Wave length of the UV lamp**

**Fig. S2**

## **3. TEM images of $\text{Fe}_3\text{O}_4@\text{SiO}_2@\text{TiO}_2$ with different ammonia content**

**Fig. S3**

## **4. TEM images of pea-like $\text{Fe}_3\text{O}_4@\text{SiO}_2@\text{TiO}_2$ with different diameter of mixing paddle**

**Fig.S4**

## **5. Formation mechanism of pea-like $\text{Fe}_3\text{O}_4@\text{SiO}_2@ \text{TiO}_2$**

The formation of a polymerized  $\text{TiO}_2$  via sol-gel process including hydrolysis and condensation process of TIPO is mainly controlled by the concentration of ammonia while maintaining other parameters [1,2]. As shown is **Fig.S5**, there are four models

observed for nucleation and growth of  $\text{TiO}_2$  on the surface of  $\text{Fe}_3\text{O}_4@\text{SiO}_2$  spheres under different ammonia concentration.

In the **Model 1**, due to the concentration of ammonia is very low, the hydrolysis and condensation rate of TIPO is so slow that the heterogeneous nucleation is difficult to proceed. Therefore, there is no  $\text{TiO}_2$  nanoparticles on the surface of  $\text{Fe}_3\text{O}_4@\text{SiO}_2$  spheres [3]. Increasing the concentration of ammonia slightly, which can promote the hydrolysis and condensation of TIPO, thus the concentration of titanium oligomers increases. When the concentration of titanium oligomers is more than the critical concentration of heterogeneous nucleation, the heterogeneous nucleation of  $\text{TiO}_2$  shell produces on the  $\text{Fe}_3\text{O}_4@\text{SiO}_2$  spheres surface (**Model 2**). With the increase of concentration of titanium oligomers which is higher than the supersaturated concentration, the small  $\text{TiO}_2$  nuclei can be formed both on the surface of  $\text{TiO}_2$  shell and the solution system (**Model 3**). Furthermore, when the initial contents of ammonia are too high, a continual cascading of  $\text{TiO}_2$  nuclei in addition to growth occurs *via* diffusion and polymerization of titanium oligomers to the  $\text{TiO}_2$  nuclei. Meanwhile, under the mechanical force-driven [4], the pea-like structured  $\text{Fe}_3\text{O}_4@\text{SiO}_2@\text{TiO}_2$  particles are formed (**Model 4**).

**Fig.S5**

**6. TEM images of PLYS-Fe<sub>3</sub>O<sub>4</sub>@TiO<sub>2</sub> spheres with different concentration of NaOH**

**Fig.S6**

**7. TEM and SEM images of PLYS-Fe<sub>3</sub>O<sub>4</sub>@TiO<sub>2</sub>**

**Fig.S7**

**8. EDS of PLYS-Fe<sub>3</sub>O<sub>4</sub>@TiO<sub>2</sub>**

The integrated energy dispersive X-ray spectroscopy (EDS) shows that the content of Ti, Fe, O is 34.35%, 13.17% and 40.61%, respectively.

**Fig. S8**

**9. Iron leaching test**

The iron leaching from the PLYS-Fe<sub>3</sub>O<sub>4</sub>@TiO<sub>2</sub> into the solution were measured using an inductively coupled plasma atomic emission spectrometer (ICP-AES; Perkin Elmer 5300DV).

**Fig.S9**

## 10. TOC removal efficiency calculation

The removal percentage of TOC was calculated by using Eq. S1

$$\text{TOC removal} = \left(1 - \frac{\text{TOC}_t}{\text{TOC}_0}\right) \times 100\% \quad (1)$$

where  $\text{TOC}_0$  and  $\text{TOC}_t$  are the TOC values at initial and time of the photocatalytic photo-Fenton process, respectively. As shown in **Fig.S10**, 65.2 % TOC was removed at pH 7 in 2h.

**Fig.S10**

**Table S1**

## Reference

- [1] Livage, J, Henry, M, Sanchez, C. Prog, Solid State Chem 18 (1988) 259-341.
- [2] Barringer. E, Bowen, H, Langmuir 1 (1985) 414-420.
- [3] W. Li, J. Yang, Z. Wu, J. Wang, B. Li, S. Feng, Y. Deng, F. Zhang, D. Zhao, A versatile kinetics-controlled coating method to construct uniform porous  $\text{TiO}_2$  shells for multifunctional core-shell structures, J Am Chem Soc, 134 (2012) 11864-11867.
- [4] Y. Tang, Y. Zhang, J. Deng, J. Wei, H. Le Tam, B.K. Chandran, Z. Dong, Z. Chen, X. Chen, Mechanical force-driven growth of elongated bending  $\text{TiO}_2$  -based nanotubular materials for ultrafast rechargeable lithium ion batteries, Adv Mater, 26 (2014) 6111-6118.

- [5] S. Ahmad Mokhtari, M. Farzadkia, A. Esrafil, R.R. Kalantari, A.J. Jafari, M. Krmani, M. Gholami, Bisphenol A removal from aqueous solutions using novel UV/Persulfate/H<sub>2</sub>O<sub>2</sub>/Cu system: optimization and modelling with central composite design and response surface methodology, *J. Env. Heal. Sci. Eng.* (2016) 14-19
- [6] M. Saquib, M. Abu Tariq, M.M. Haque, M. Muneer, Photocatalytic degradation of disperse blue 1 using UV/TiO<sub>2</sub>/H<sub>2</sub>O<sub>2</sub> process, *J. Env. Mana.* (2008) 88, 300-306
- [7] S. Kang, J.Y. Do, S.W. Jo, K.M. Kim, K.M. Jeong, S.M. Park, M. Kang, Efficient removal of bisphenol A by an advanced photocatalytic oxidation-type UV/H<sub>2</sub>O<sub>2</sub>/Fe-loaded TiO<sub>2</sub> system. *Bulletin of the Korean Chemical Society*, (2006) 36, 2006-2014

## **Figure List of supporting information**

**Fig.S1** Schematic diagram of experimental set up

**Fig.S2** Wave length of the UV lamp

**Fig.S3** TEM images of Fe<sub>3</sub>O<sub>4</sub>@SiO<sub>2</sub>@TiO<sub>2</sub> with different ammonia content

**Fig.S4** TEM images of pea-like Fe<sub>3</sub>O<sub>4</sub>@SiO<sub>2</sub>@TiO<sub>2</sub> with different diameter of mixing paddle

**Fig.S5** Schematic diagram of formation mechanism of pea-like Fe<sub>3</sub>O<sub>4</sub>@SiO<sub>2</sub>@TiO<sub>2</sub>

**Fig.S6** TEM images of Fe<sub>3</sub>O<sub>4</sub>@tate spheres with different concentration of NaOH

**Fig.S7** TEM and SEM images of PLYS- Fe<sub>3</sub>O<sub>4</sub>@TiO<sub>2</sub>

**Fig.S8** EDS of PLYS-  $\text{Fe}_3\text{O}_4@\text{TiO}_2$

**Fig.S9** Iron leaching test

**Fig.S10** TOC removal efficiency calculation

### Table List of supporting information

**Table S1** Comparing reaction rate constants in different systems and conditions

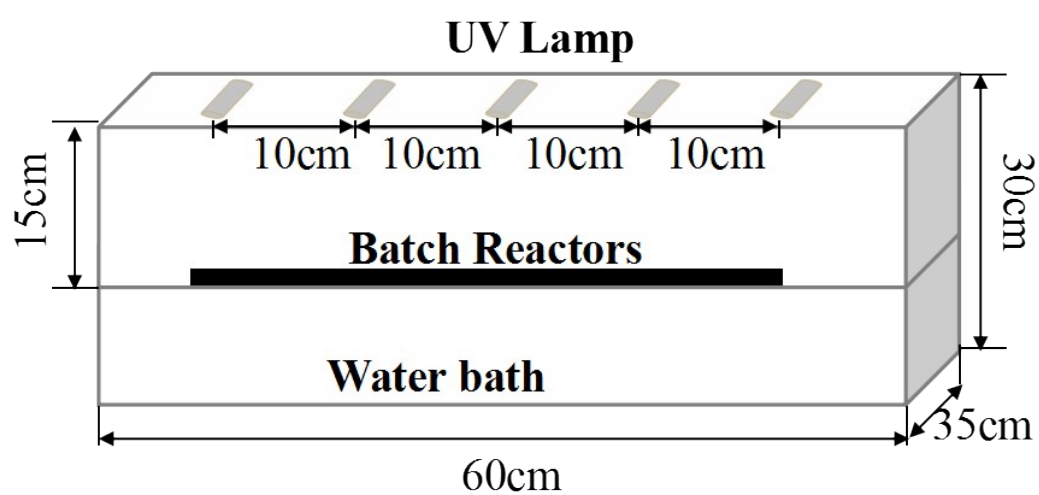

**Fig.S1** Schematic diagram of experimental set up

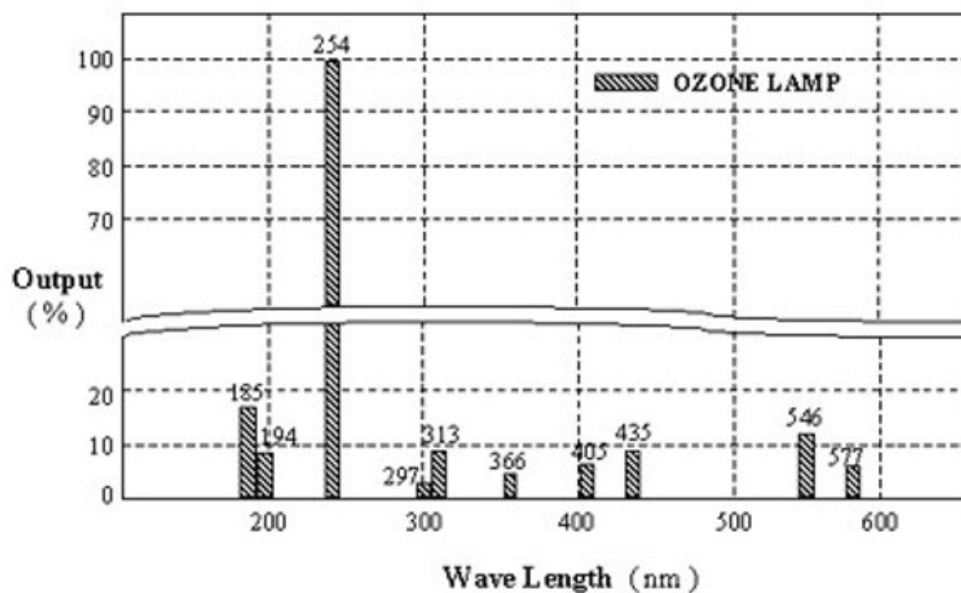

Fig.S2 Wave length of the UV lamp

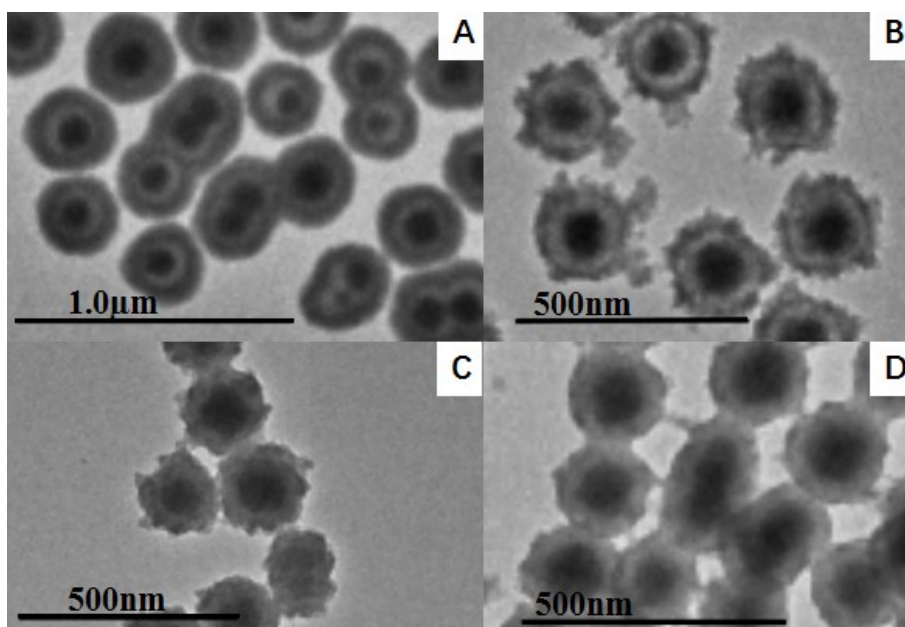

Fig.S3 TEM images of  $\text{Fe}_3\text{O}_4@\text{SiO}_2@\text{TiO}_2$  with different ammonia content



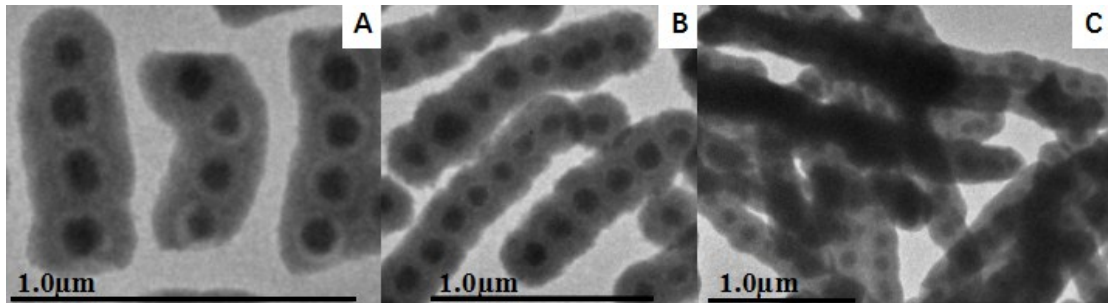

**Fig.S4** TEM images of pea-like  $\text{Fe}_3\text{O}_4@\text{SiO}_2@\text{TiO}_2$  with different diameter of mixing paddle

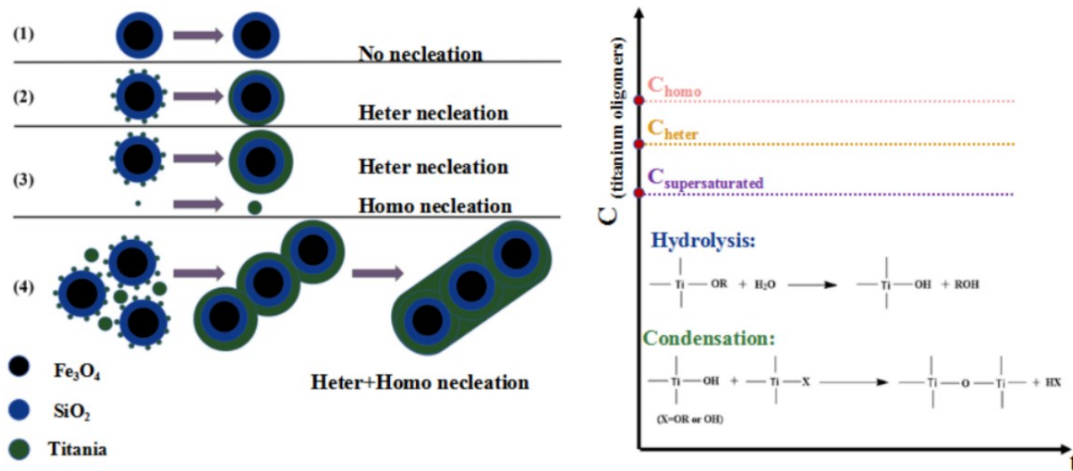

**Fig.S5** Schematic diagram of formation mechanism of pea-like  $\text{Fe}_3\text{O}_4@\text{SiO}_2@\text{TiO}_2$

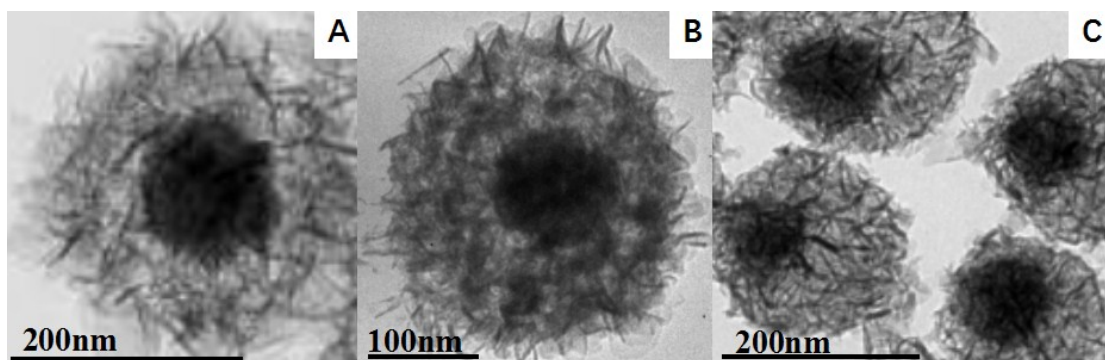

**Fig.S6** TEM images of PLYS-Fe<sub>3</sub>O<sub>4</sub>@TiO<sub>2</sub> spheres with different concentration of NaOH

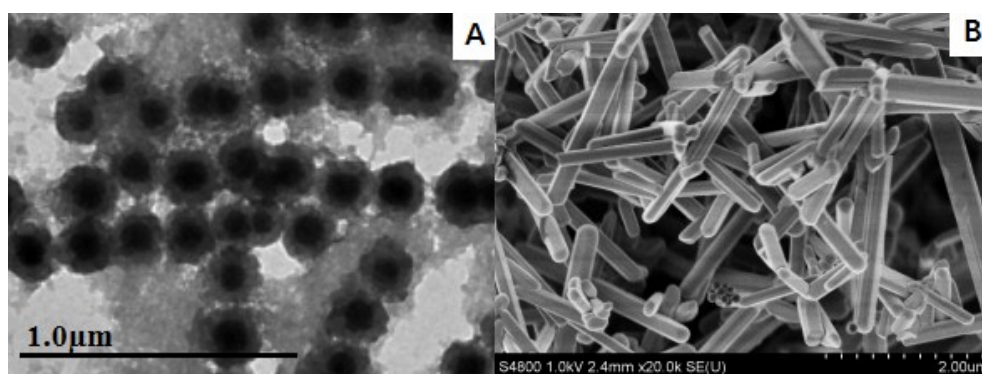

**Fig.S7** TEM and SEM images of PLYS-Fe<sub>3</sub>O<sub>4</sub>@TiO<sub>2</sub>

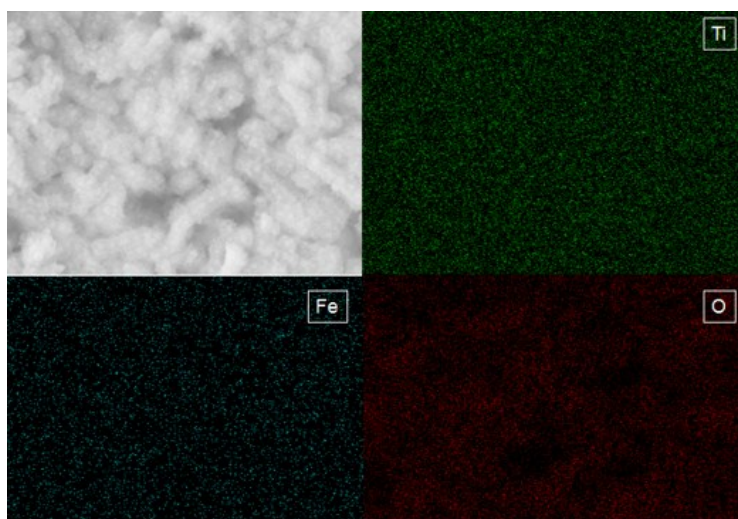

**Fig.S8** EDS of PLYS-Fe<sub>3</sub>O<sub>4</sub>@TiO<sub>2</sub>

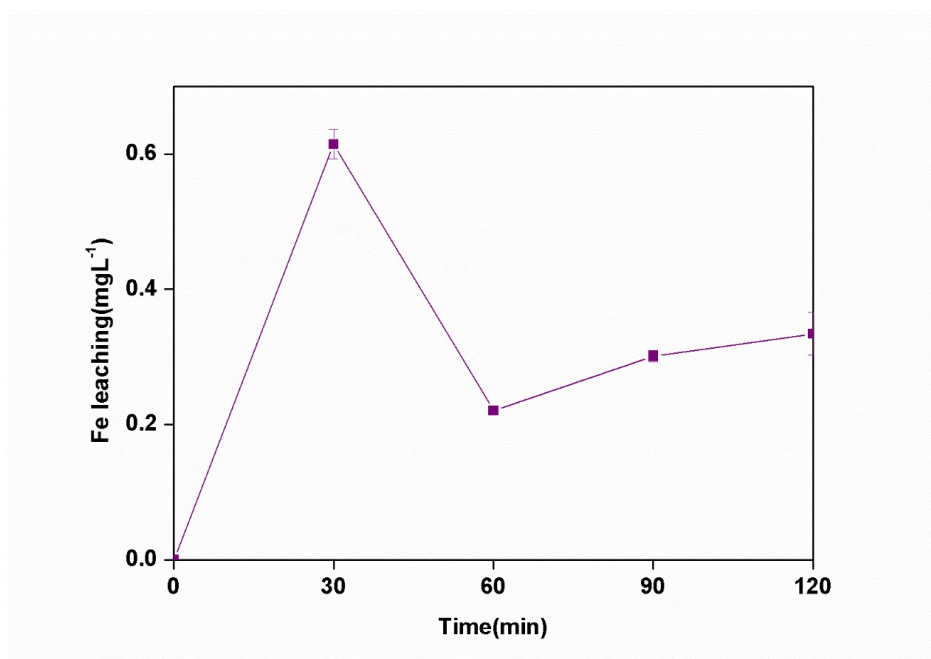

**Fig.S9** Iron leaching test

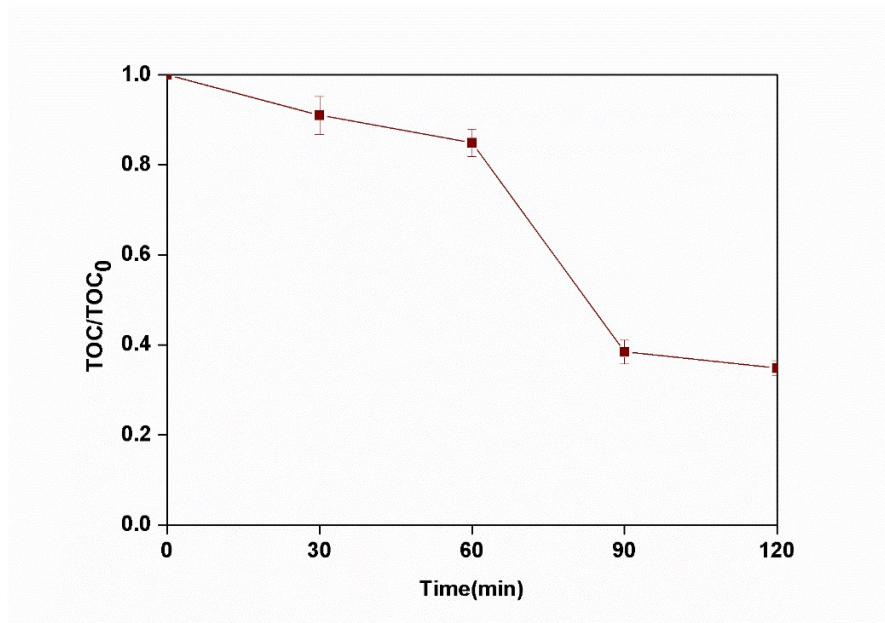

**Fig.S10** TOC removal efficiency calculation

**Table S1** Comparing reaction rate constants in different systems and conditions

| System                                                                                  | Condition and                                                                                                                                                                                 | kinetic constant<br>(min <sup>-1</sup> ) | Ref.          |
|-----------------------------------------------------------------------------------------|-----------------------------------------------------------------------------------------------------------------------------------------------------------------------------------------------|------------------------------------------|---------------|
| Only UV                                                                                 | Intensity=800 $\mu\text{Wcm}^{-2}$ ,<br>Temp.=25°C, BPA=0.088 mM                                                                                                                              | ND                                       |               |
| Only PLYS-Fe <sub>3</sub> O <sub>4</sub> @TiO <sub>2</sub>                              | PLYS-Fe <sub>3</sub> O <sub>4</sub> @TiO <sub>2</sub> =1.5 g L <sup>-1</sup> ,<br>BPA=0.088 mM, Temp.=25°C,                                                                                   | ND                                       |               |
| Only H <sub>2</sub> O <sub>2</sub>                                                      | H <sub>2</sub> O <sub>2</sub> =18.9 mM, BPA=0.088<br>mM, Temp.=25°C                                                                                                                           | 1.5×10 <sup>-3</sup>                     |               |
| UV/H <sub>2</sub> O <sub>2</sub>                                                        | H <sub>2</sub> O <sub>2</sub> =18.9 mM, BPA=0.088<br>mM, Temp.=25°C, Intensity=800<br>$\mu\text{Wcm}^{-2}$                                                                                    | 3.0×10 <sup>-3</sup>                     |               |
| UV/ PLYS-Fe <sub>3</sub> O <sub>4</sub> @TiO <sub>2</sub>                               | PLYS-Fe <sub>3</sub> O <sub>4</sub> @TiO <sub>2</sub> =1.5 g L <sup>-1</sup> ,<br>BPA=0.088 mM, Temp.=25°C,<br>Intensity=800 $\mu\text{Wcm}^{-2}$                                             | 3.4×10 <sup>-3</sup>                     |               |
| PLYS-Fe <sub>3</sub> O <sub>4</sub> @TiO <sub>2</sub> /H <sub>2</sub> O <sub>2</sub>    | PLYS-Fe <sub>3</sub> O <sub>4</sub> @TiO <sub>2</sub> =1.5 g L <sup>-1</sup> ,<br>BPA=0.088 mM, Temp.=25°C,<br>H <sub>2</sub> O <sub>2</sub> =18.9 mM                                         | 2.7×10 <sup>-3</sup>                     | This<br>study |
| UV/TiO <sub>2</sub> (P25)/H <sub>2</sub> O <sub>2</sub>                                 | Intensity=800 $\mu\text{Wcm}^{-2}$ ,<br>TiO <sub>2</sub> (P25)=1.5 g L <sup>-1</sup> , BPA=0.088<br>mM, Temp.=25°C, H <sub>2</sub> O <sub>2</sub> =18.9<br>mM                                 | 11.5×10 <sup>-3</sup>                    |               |
| UV/Fe <sub>3</sub> O <sub>4</sub> /H <sub>2</sub> O <sub>2</sub>                        | Intensity=800 $\mu\text{Wcm}^{-2}$ ,<br>Fe <sub>3</sub> O <sub>4</sub> =1.5 g L <sup>-1</sup> , BPA=0.088<br>mM, Temp.=25°C, H <sub>2</sub> O <sub>2</sub> =18.9<br>mM                        | 2.9×10 <sup>-3</sup>                     |               |
| UV/PLYS-Fe <sub>3</sub> O <sub>4</sub> @TiO <sub>2</sub> /H <sub>2</sub> O <sub>2</sub> | Intensity=800 $\mu\text{Wcm}^{-2}$ ,<br>PLYS-Fe <sub>3</sub> O <sub>4</sub> @TiO <sub>2</sub> =1.5 g L <sup>-1</sup> ,<br>H <sub>2</sub> O <sub>2</sub> =18.9 mM, BPA=0.088<br>mM, Temp.=25°C | 24.2×10 <sup>-3</sup>                    |               |
| UV/S <sub>2</sub> O <sub>8</sub> <sup>2-</sup> /H <sub>2</sub> O <sub>2</sub> /Cu       | UV=Mercury lamp (diameter                                                                                                                                                                     | 43×10 <sup>-3</sup>                      | [5]           |
| UV/H <sub>2</sub> O <sub>2</sub>                                                        | 8×length 90 cm); power=12 W;                                                                                                                                                                  | 6×10 <sup>-3</sup>                       |               |

|                                                                 |                                                                                                                                                                                   |                       |     |
|-----------------------------------------------------------------|-----------------------------------------------------------------------------------------------------------------------------------------------------------------------------------|-----------------------|-----|
| UV/Cu                                                           | BPA=0.099 mM; S <sub>2</sub> O <sub>8</sub> <sup>2-</sup> =0.339 mM;                                                                                                              | 3.4×10 <sup>-3</sup>  |     |
| UV/S <sub>2</sub> O <sub>2</sub> /H <sub>2</sub> O <sub>2</sub> | mM; H <sub>2</sub> O <sub>2</sub> =0.294 mM;                                                                                                                                      | 18×10 <sup>-3</sup>   |     |
| UV/H <sub>2</sub> O <sub>2</sub> /Cu                            | Cu <sup>+</sup> =0.273 mM                                                                                                                                                         | 9.6×10 <sup>-3</sup>  |     |
| UV/S <sub>2</sub> O <sub>8</sub> <sup>2-</sup> /Cu              |                                                                                                                                                                                   | 11×10 <sup>-3</sup>   |     |
| UV/Fe-TiO <sub>2</sub> (3% Fe)/H <sub>2</sub> O <sub>2</sub>    | UV=Mercury lamp(diameter 2.0×length 15 cm); Intensity=18 W cm <sup>-2</sup> ; BPA=0.044 mM; H <sub>2</sub> O <sub>2</sub> =1 mL(2L volume); catalytic loading=1 g L <sup>-1</sup> | 15.4×10 <sup>-3</sup> | [6] |
| UV/TiO <sub>2</sub> (P25)/H <sub>2</sub> O <sub>2</sub>         | UV=254 nm(1.25 mW cm <sup>-2</sup> ); dye=0.25 mM; H <sub>2</sub> O <sub>2</sub> =0.1 mL(250 mL); TiO <sub>2</sub> =1g L <sup>-1</sup>                                            | 5.7×10 <sup>-3</sup>  | [7] |
| UV/TiO <sub>2</sub>                                             |                                                                                                                                                                                   | 3.1×10 <sup>-3</sup>  |     |
